# Supplementary material for: Targeted regulation of the selectivity of cascade synthesis towards imines/secondary amines by carbon-coated Co-based catalysts
Source: Royal Society of Chemistry journal article supplement (doi:10.1039/d2gc02161g), 2022-01-01
Supplement: d2gc02161g1.pdf [file d2gc02161g1.pdf]

## Supporting Information

### Targeted-regulating the selectivity of cascade synthesis towards imines/secondary amines by carbon-coated Co-based catalysts

Songtao Huang,<sup>‡a</sup> Zijiang Zhao,<sup>‡a</sup> Zhongzhe Wei,<sup>\*a,b</sup> Mingxuan Wang,<sup>a</sup> Yi Chen,<sup>a</sup>

Xiaosa Wang,<sup>a</sup> Fangjun Shao,<sup>a</sup> Xing Zhong,<sup>a</sup> Xiaonian Li<sup>a</sup> and Jianguo Wang<sup>\*a</sup>

<sup>a</sup>Institute of Industrial Catalysis, College of Chemical Engineering, Zhejiang University  
of Technology, Hangzhou 310032, P. R. China.

<sup>b</sup>SINOPEC Ningbo New Materials Research Institute Company Limited, Ningbo  
315207, Zhejiang, China.

\*Corresponding Authors.

E-mail: weizhze@zjut.edu.cn, jgw@zjut.edu.cn

<sup>‡</sup>These authors have contributed equally.

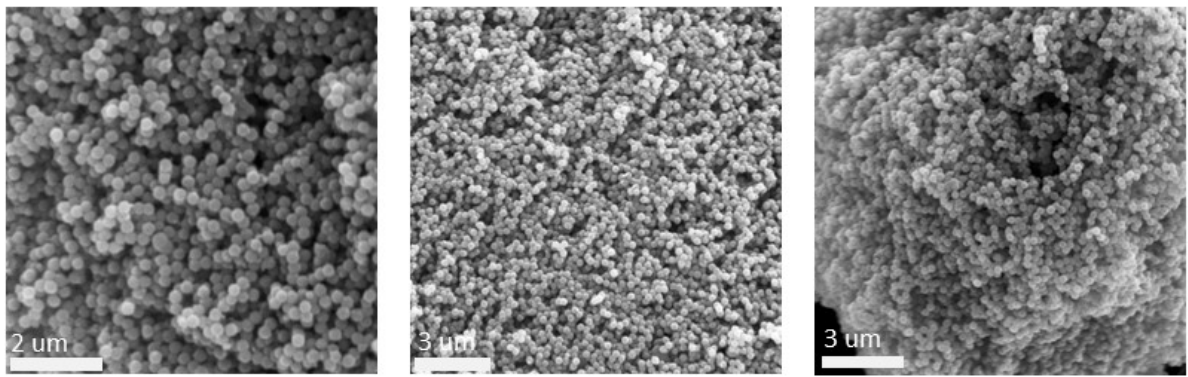

**Figure S1.** Representative SEM images of PtCo/SiO<sub>2</sub>@CN

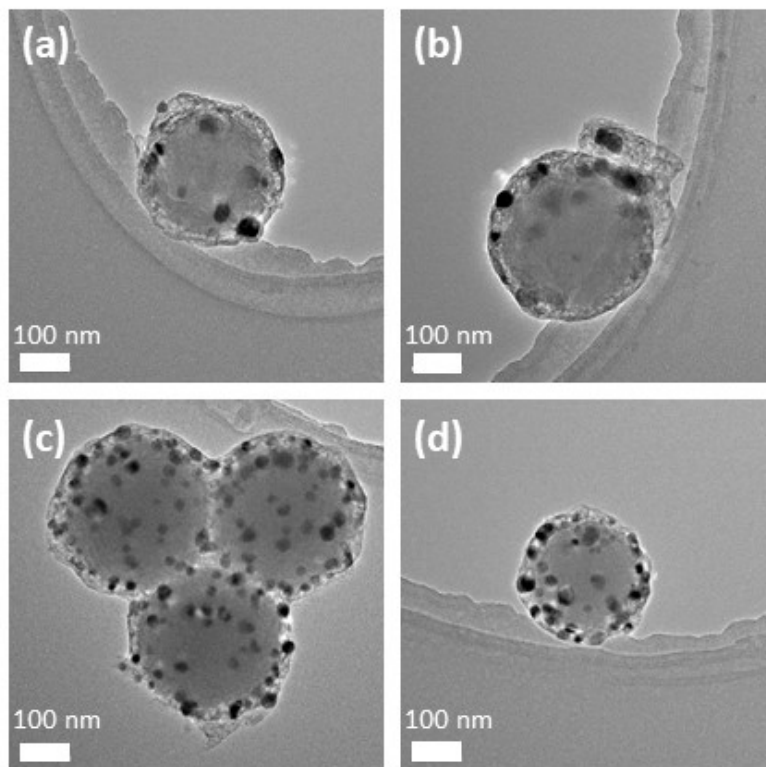

**Figure S2.** TEM images of the effect of ethanol, water and ammonia water on the morphology of SiO<sub>2</sub> balls and the degree of metal dispersion when the ratio of ethanol, water and ammonia water was 12.5 : 1.65 : 0.5. a, b) Co/SiO<sub>2</sub>@CN; c, d) PtCo/SiO<sub>2</sub>@CN.

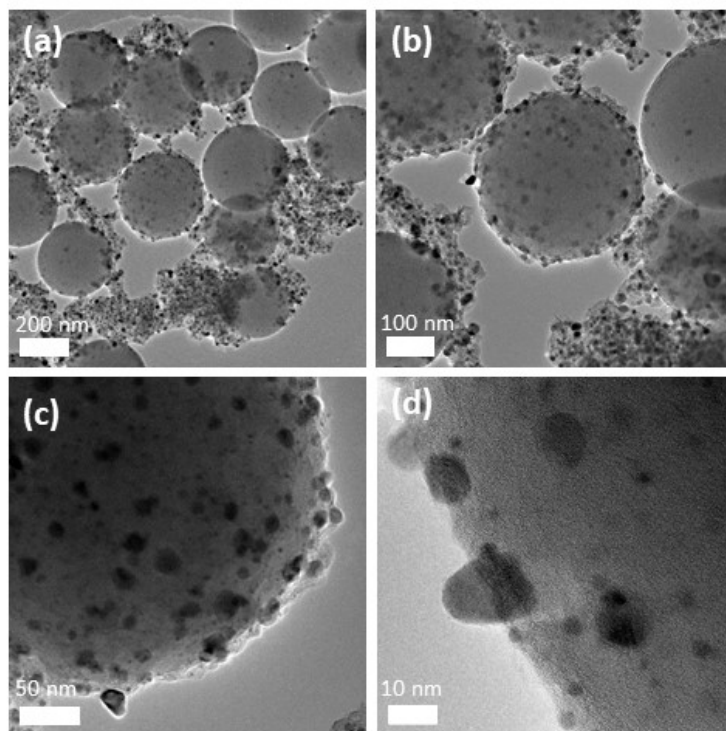

**Figure S3.** TEM images of the effect of ethanol, water and ammonia water on the morphology of SiO<sub>2</sub> balls and the degree of metal dispersion when the ratio of ethanol, water and ammonia water was 24 : 80 : 1. a, b, c, d) PtCo/SiO<sub>2</sub>@CN.

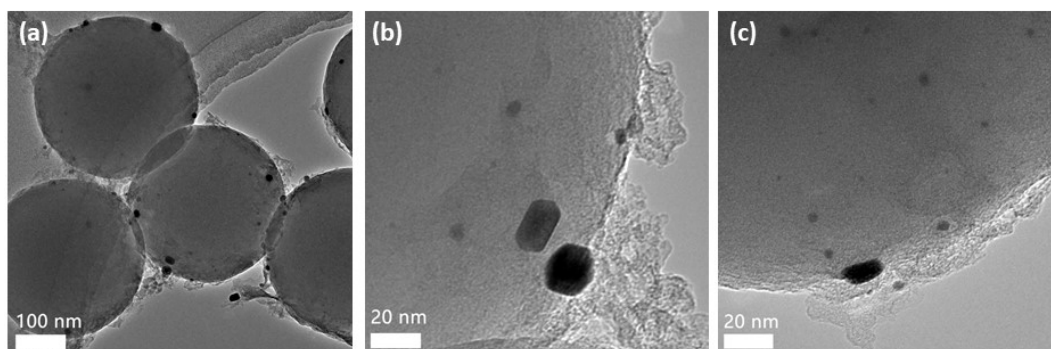

**Figure S4.** a,b,c) Representative TEM images of Pt/SiO<sub>2</sub>@CN.

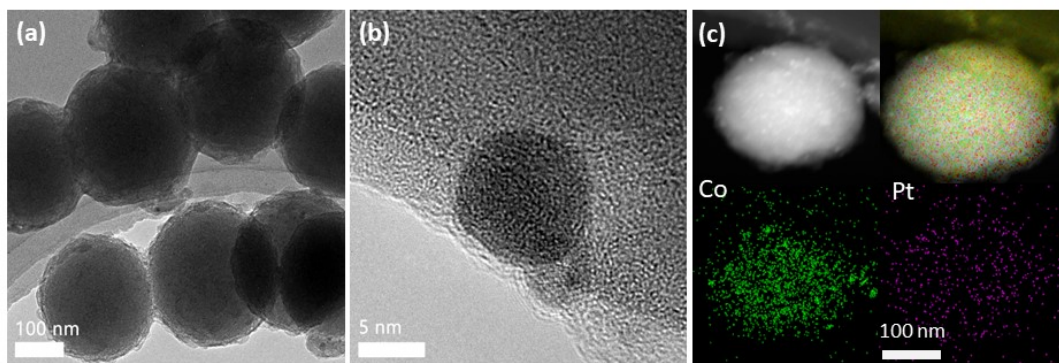

**Figure S5.** a,b,c) Representative TEM and HRTEM images of PtCo/SiO<sub>2</sub>@CN-HCl-21day and the corresponding EDS elemental mapping of Co and Pt.

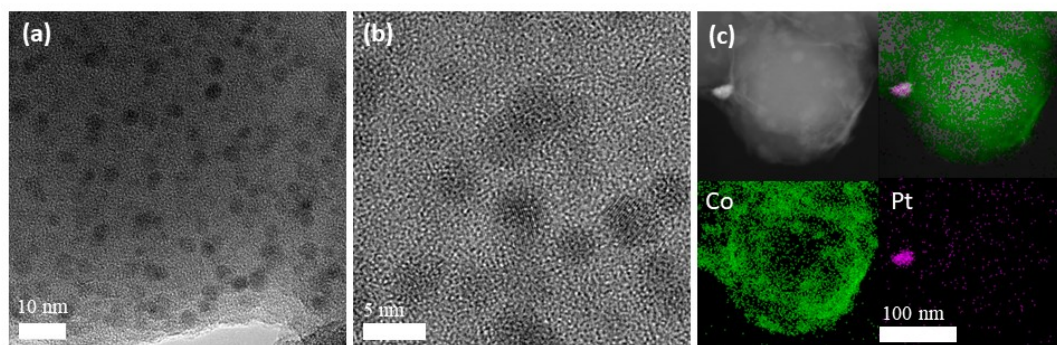

**Figure S6.** a,b,c) Representative TEM and HRTEM images of PtCo/SiO<sub>2</sub>-NaBH<sub>4</sub> and the corresponding EDS elemental mapping of Co and Pt.

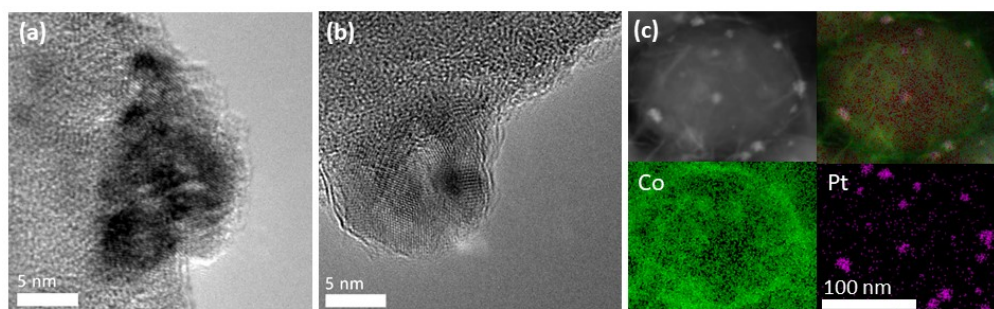

**Figure S7.** a,b,c) Representative HRTEM images of Co/SiO<sub>2</sub>@CN-Pt and the corresponding EDS elemental mapping of Co and Pt.

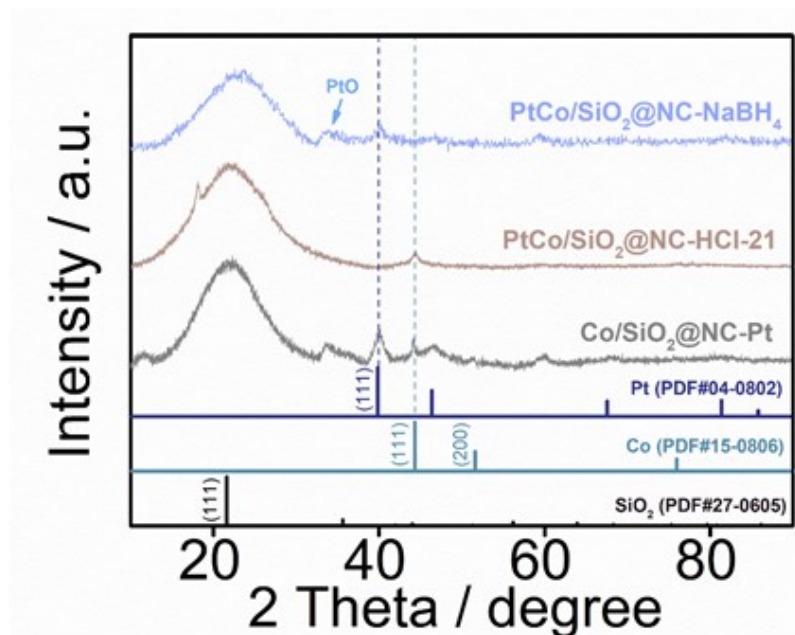

**Figure S8.** XRD images of Co/SiO<sub>2</sub>@CN-Pt, PtCo/SiO<sub>2</sub>@CN-HCl-21day and PtCo/SiO<sub>2</sub>-NaBH<sub>4</sub>.

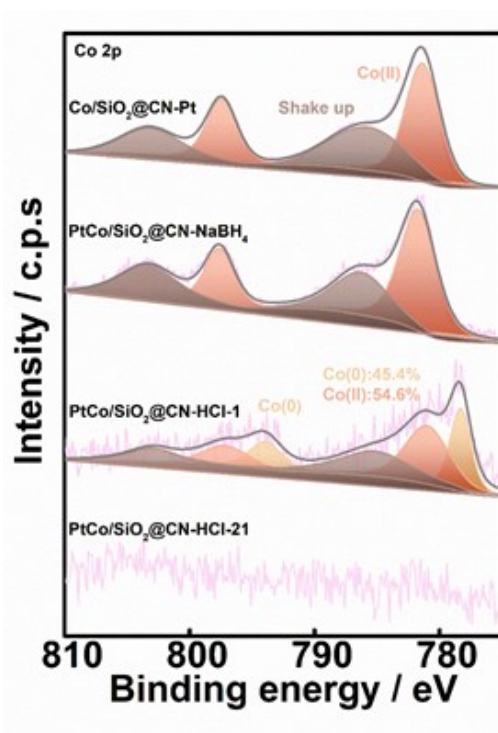

**Figure S9.** Co 2p XPS spectrum images of Co/SiO<sub>2</sub>@CN-Pt, PtCo/SiO<sub>2</sub>@CN-HCl-1day, PtCo/SiO<sub>2</sub>@CN-HCl-21day and PtCo/SiO<sub>2</sub>-NaBH<sub>4</sub>.

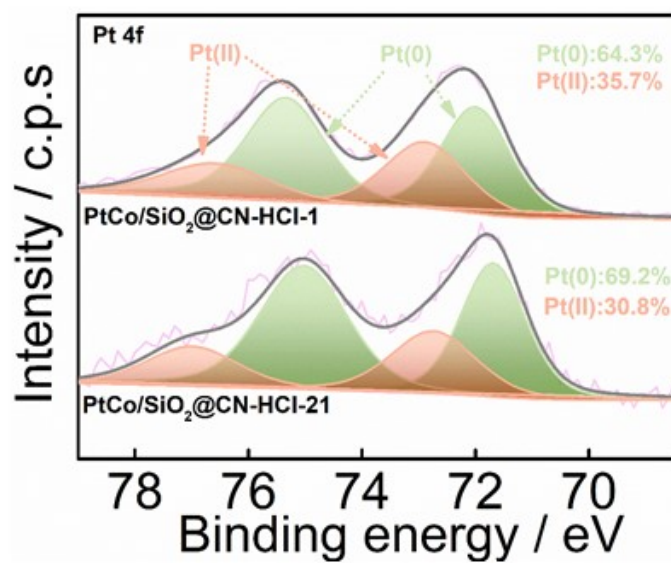

**Figure S10.** Pt 4f XPS spectrum images of PtCo/SiO<sub>2</sub>@CN-HCl-1day, PtCo/SiO<sub>2</sub>@CN-HCl-21day.

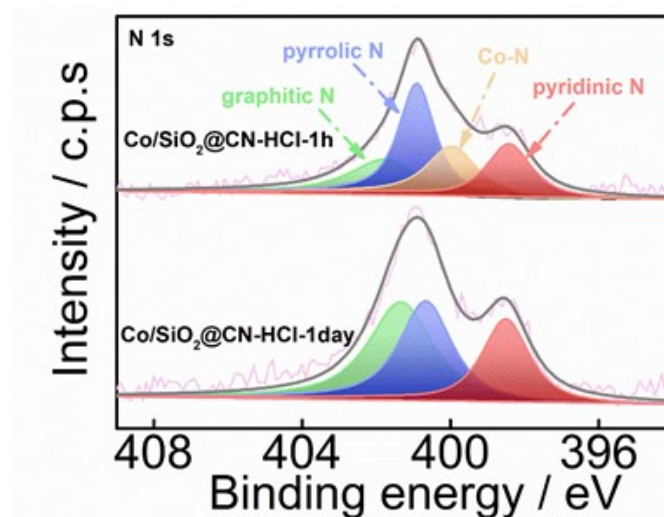

**Figure S11.** N 1s XPS spectrum images of Co/SiO<sub>2</sub>@CN-HCl-1h and Co/SiO<sub>2</sub>@CN-HCl-1day.

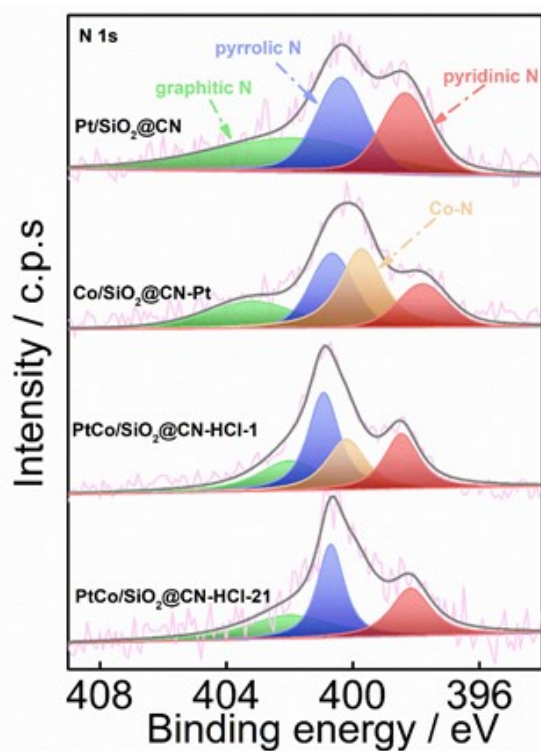

**Figure S12.** N 1s XPS spectrum images of Pt/SiO<sub>2</sub>@CN, Co/SiO<sub>2</sub>@CN-Pt, PtCo/SiO<sub>2</sub>@CN-HCl-1day and PtCo/SiO<sub>2</sub>@CN-HCl-21day.

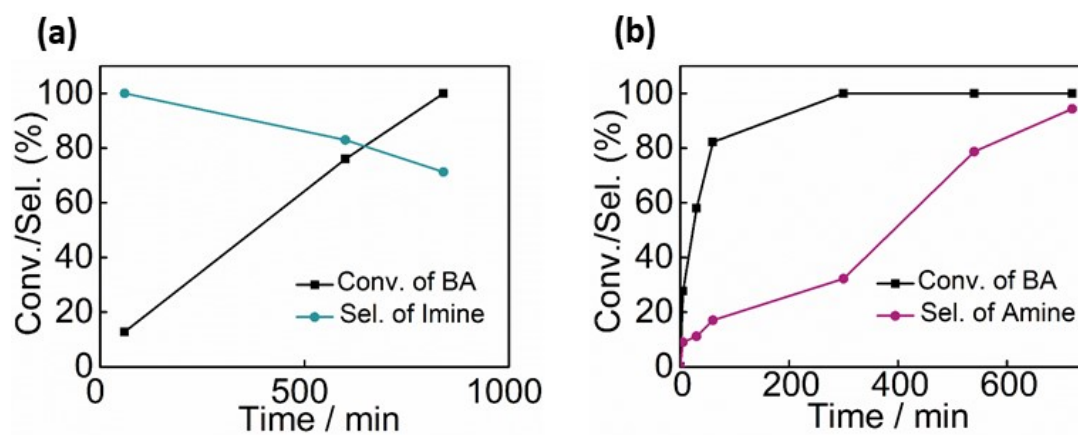

**Figure S13.** Activity test of PtCo/SiO<sub>2</sub>@CN at different temperatures a) room temperature, b) 50 °C.

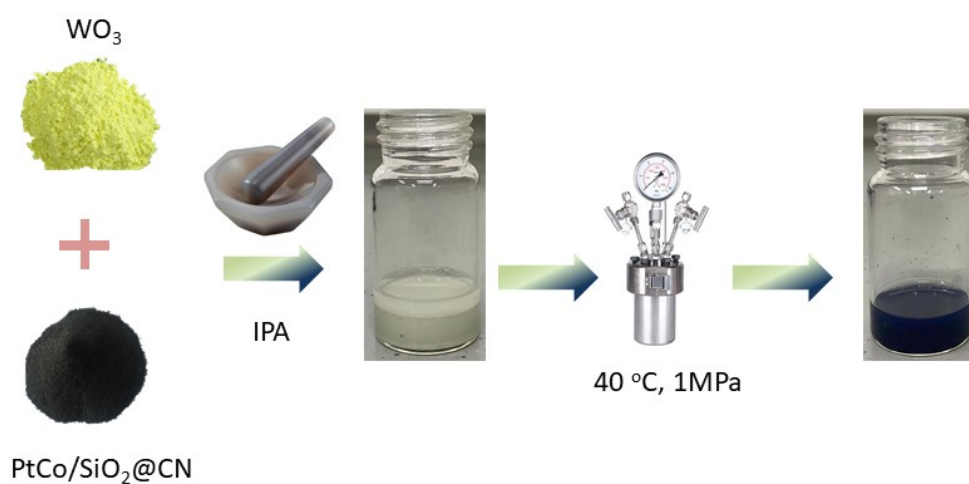

**Figure S14.** Physical mixed solution of PtCo/SiO<sub>2</sub>@CN and WO<sub>3</sub> before and after the reaction. Reaction conditions: 1.02 g mixture catalyst (PtCo/SiO<sub>2</sub>@CN : WO<sub>3</sub>=1:50), 600 r/min, 5 mL solvent, 1 h, 1 Mpa H<sub>2</sub>.

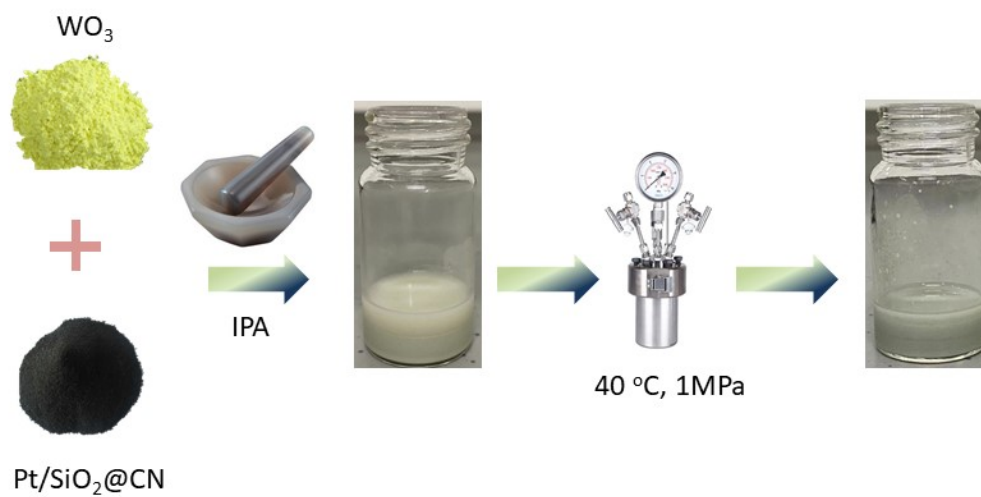

**Figure S15.** Physical mixed solution of Pt/SiO<sub>2</sub>@CN and WO<sub>3</sub> before and after the reaction. Reaction conditions: 1.02 g mixture catalyst (PtCo/SiO<sub>2</sub>@CN : WO<sub>3</sub>=1:50), 600 r/min, 5 mL solvent, 1 h, 1 Mpa H<sub>2</sub>.



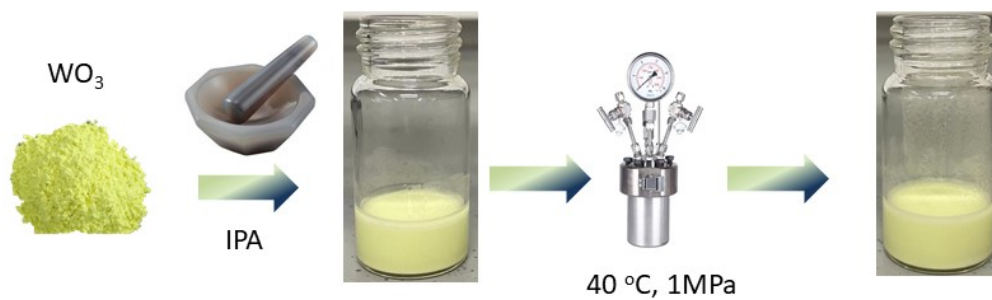

**Figure S16.** Solution of  $\text{WO}_3$  before and after the reaction. Reaction conditions: 1 g  $\text{WO}_3$ , 600 r/min, 5 mL solvent, 4 h, 1 MPa  $\text{H}_2$ .

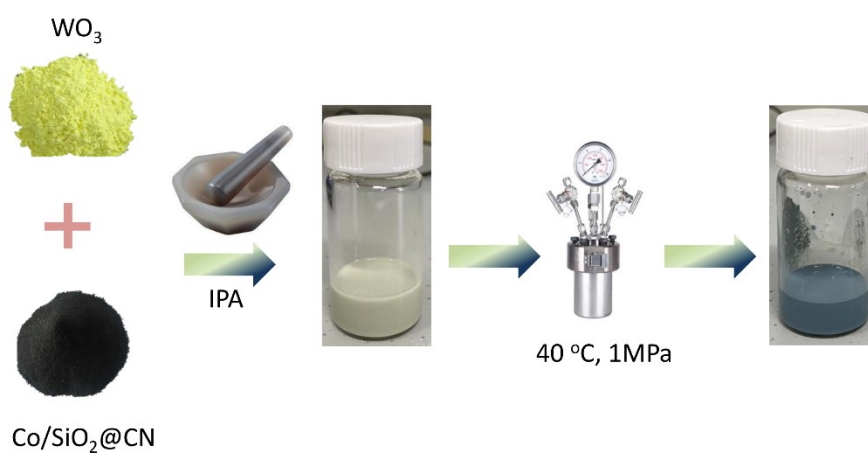

**Figure S17.** Physical mixed solution of  $\text{Co/SiO}_2@\text{CN}$  and  $\text{WO}_3$  before and after the reaction. Reaction conditions: 1.02 g mixture catalyst ( $\text{Co/SiO}_2@\text{CN} : \text{WO}_3 = 1:50$ ), 600 r/min, 5 mL solvent, 4.5 h, 1 MPa  $\text{H}_2$ .

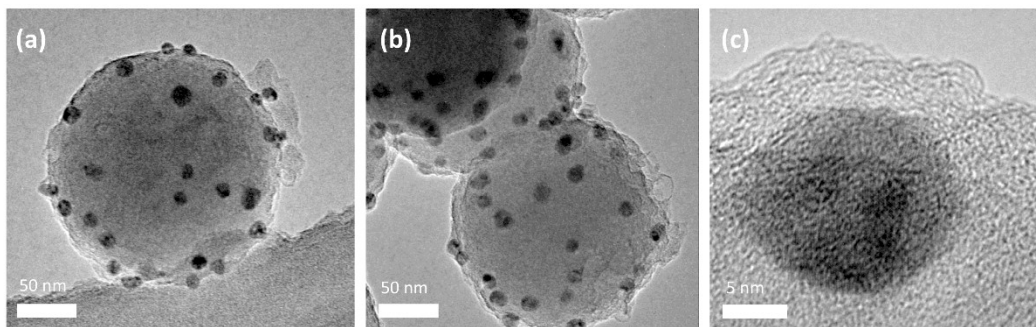

**Figure S18.** a, b, c) Representative TEM and HRTEM images of the used Co/SiO<sub>2</sub>@CN.

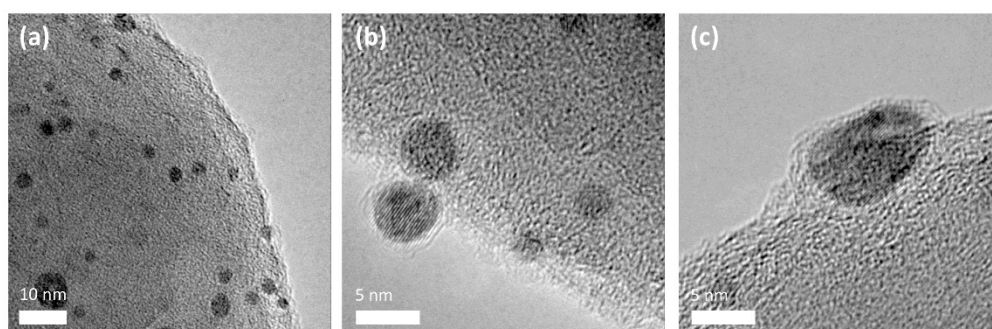

**Figure S19.** a, b, c) Representative TEM and HRTEM images of the used PtCo/SiO<sub>2</sub>@CN.

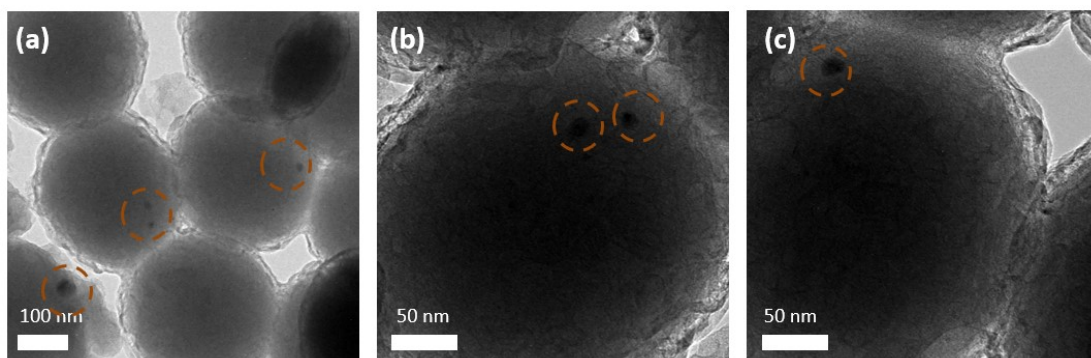

**Figure S20.** a, b, c) Representative TEM images of the Co/SiO<sub>2</sub>@CN-HCl-1day.

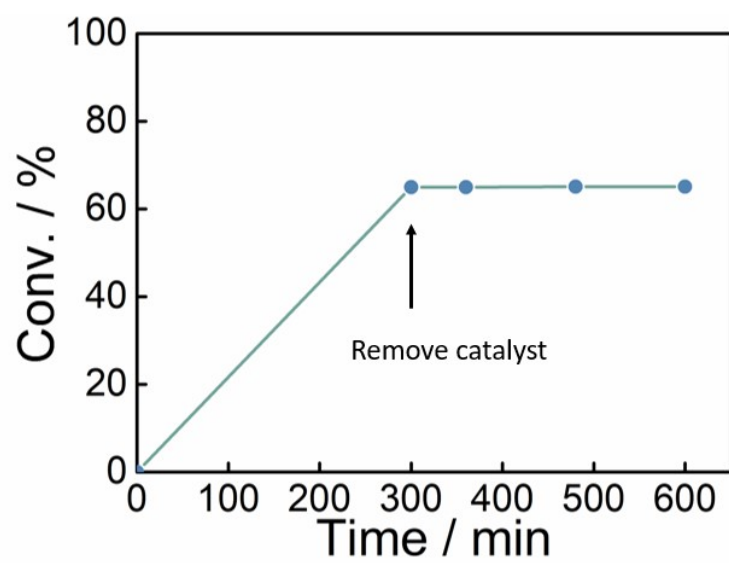

**Figure S21.** Hot filtration experiments of Co/SiO<sub>2</sub>@CN.

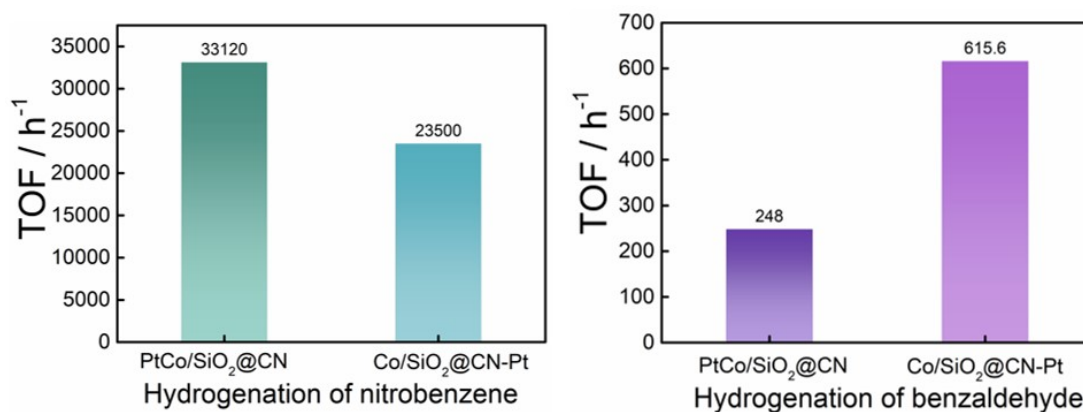

**Figure S22.** Effect of Pt in and out of carbon layer on reaction rate. a) hydrogenation of nitrobenzene, b) hydrogenation of benzaldehyde.

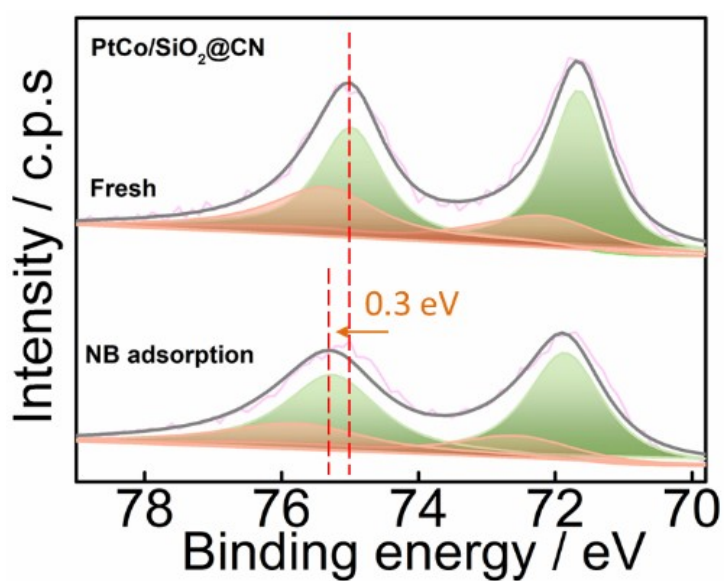

**Figure S23.** Pt 4f XPS spectra of PtCo/SiO<sub>2</sub>@CN before and after NB adsorption.

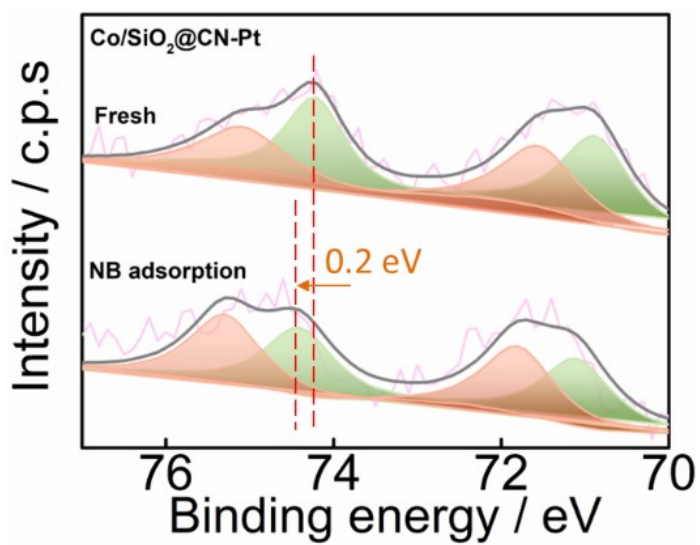

Figure S24. Pt 4f XPS spectra of Co/SiO<sub>2</sub>@CN-Pt before and after NB adsorption.

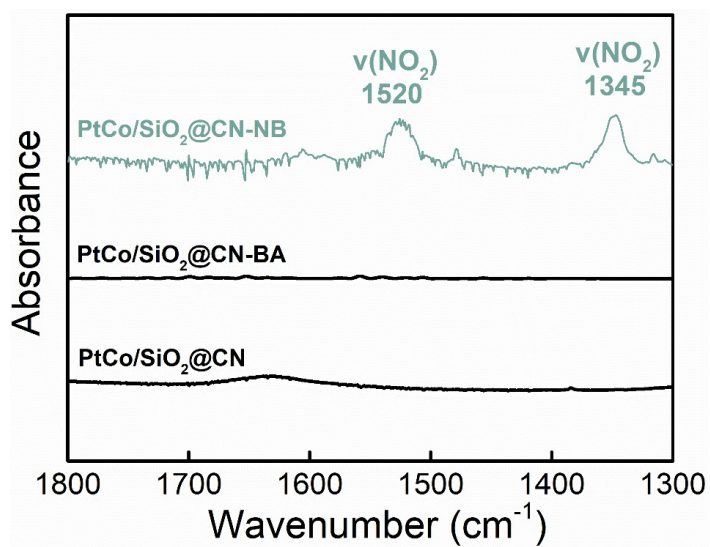

Figure S25. FT-IR spectra of PtCo/SiO<sub>2</sub>@CN after treatment with BA and NB.

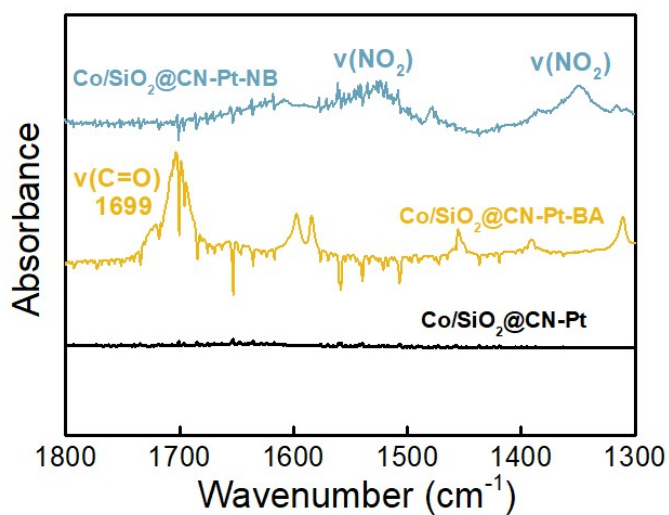

**Figure S26.** FT-IR spectra of  $\text{Co/SiO}_2\text{@CN-Pt}$  after treatment with BA and NB.

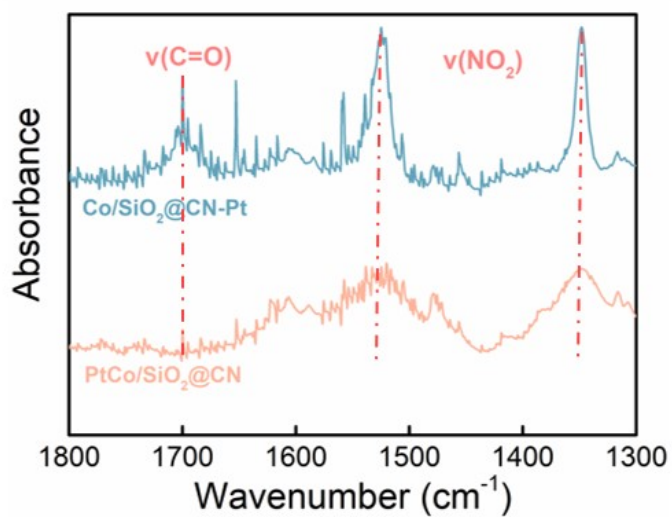

**Figure S27.** FT-IR spectra of  $\text{PtCo/SiO}_2\text{@CN}$  and  $\text{Co/SiO}_2\text{@CN-Pt}$  after treatment with the mixture of BA and NB.

**Table S1.** ICP testing of each catalyst

| Sample                                   | Metal loading |           |
|------------------------------------------|---------------|-----------|
|                                          | Pt (wt.%)     | Co (wt.%) |
| PtCo/SiO <sub>2</sub> @CN                | 0.8           | 8.4       |
| Co/SiO <sub>2</sub> @CN-Pt               | 1.4           | 10.2      |
| PtCo/SiO <sub>2</sub> -NaBH <sub>4</sub> | 1.1           | 10.8      |
| Co/SiO <sub>2</sub> @CN                  | /             | 9.0       |
| Pt/SiO <sub>2</sub> @CN                  | 0.8           | /         |

**Table S2.** Comparison of the catalytic performance of PtCo/SiO<sub>2</sub>@CN and Co/SiO<sub>2</sub>@CN with other catalytic system in references

| Entry | Catalyst                                          | T<br>[°C] | Pre.<br>[MPa] | TOF[h <sup>-1</sup> ] | Selectivity[%] |                                        | Ref.      |
|-------|---------------------------------------------------|-----------|---------------|-----------------------|----------------|----------------------------------------|-----------|
|       |                                                   |           |               |                       | Imine          | Amine                                  |           |
| 1     | Co/SiO <sub>2</sub> @CN                           | 60        | 1             | 64                    | 98.0           |                                        | This work |
| 2     | PtCo/SiO <sub>2</sub> @CN                         | 60        | 1             | 296                   |                | 100                                    | This work |
| 3     | CAT-450                                           | 120       | 2             | -                     | 0.7            | 85.2                                   | [1]       |
| 4     | Pd <sub>3</sub> /γ-Al <sub>2</sub> O <sub>3</sub> | 80        | 2             | 9.2                   | 94.5           |                                        | [2]       |
| 5     | CoOx@NC-800                                       | 110       | 5             | -                     | 100            |                                        | [3]       |
| 6     | CoS <sub>2</sub> @MoS <sub>2</sub> -180-0.75      | 60        | 1.5           | -                     | 93             | 3.8                                    | [4]       |
| 7     | Ni <sub>3</sub> Sn <sub>2</sub> /TiO <sub>2</sub> | 150       | 1             | 2.2                   | 100            |                                        | [5]       |
| 8     | NiCo <sub>5</sub>                                 | 90        | 1             | 10.0                  | 83             |                                        | [6]       |
| 9     | Co/mCN-900                                        | 120       | 1             | 12.3                  | 0.2            | 99.8                                   | [7]       |
| 10    | Pd <sub>1</sub> Ag <sub>1</sub> @MIL-101          | r.t.      | 0.2           | 20.2                  | 3              | 90                                     | [8]       |
| 11    | AuPd-Fe <sub>3</sub> O <sub>4</sub>               | r.t.      | 0.1           | 93.3                  |                | 93                                     | [9]       |
| 12    | GA-Pd                                             | r.t.      | 0.1           | -                     |                | 88                                     | [10]      |
| 13    | Fe <sub>2</sub> O <sub>3</sub> /NGr@C             | 120       | 5             | 1.48                  |                | 89                                     | [11]      |
| 14    | CoOx@NCNTs                                        | 110       | 3             | 8.3                   | 100 ,          | Hydrogenation of nitrobenzene          | [12]      |
| 15    | Co-SiCN                                           | 110       | 5             | 1.4                   | 82             |                                        | [13]      |
| 16    | Ni/C                                              | 140       | 1             | 6.3                   | 86.6 ,         | hydrogenation of o-chloronitrobenzenes | [14]      |
| 17    | Ni-W <sub>2</sub> C/mpg-CN <sub>x</sub>           | 220       | 2.5           | 28.1                  | 100 ,          | Hydrogenation of nitrobenzene          | [15]      |
| 18    | Co/NC-600                                         | 170       | 4             | -                     |                | 99.4                                   | [16]      |

## References

- [1] Y. Zhang, Y. Gao, S. Yao, S. Li, H. Asakura, K. Teramura, H. Wang, D. Ma, Sublimation-Induced Sulfur Vacancies in MoS<sub>2</sub> Catalyst for One-Pot Synthesis of Secondary Amines, *ACS Catal.*, 9 (2019) 7967-7975.
- [2] L. Bao, C. Zhao, S. Li, Y. Zhu, Benzalaniline from nitrobenzene and benzaldehyde catalyzed efficiently by an atomically precise palladium nanocluster, *Chinese J. Catal.*, 40 (2019) 1499-1504.
- [3] T. Song, P. Ren, Y. Duan, Z. Wang, X. Chen, Y. Yang, Cobalt nanocomposites on N-doped hierarchical porous carbon for highly selective formation of anilines and imines from nitroarenes, *Green Chem.*, 20 (2018) 4629-4637.



- [4] W. Han, J. Wang, X. Li, L. Zhou, Y. Yang, M. Tang, H. Ge, One-pot solvothermal synthesized CoS<sub>2</sub>@MoS<sub>2</sub> nanocomposites for selective reduction coupling reaction to synthesize imines, *Catal. Commun.*, 124 (2019) 86-91.
- [5] M. Sankar, Q. He, S. Dawson, E. Nowicka, L. Lu, P.C.A. Bruijninx, A.M. Beale, C.J. Kiely, B.M. Weckhuysen, Supported bimetallic nano-alloys as highly active catalysts for the one-pot tandem synthesis of imines and secondary amines from nitrobenzene and alcohols, *Catal. Sci. Technol.*, 6 (2016) 5473-5482.
- [6] C. Chen, R. Fan, M. Han, X. Zhu, Y. Zhang, H. Zhang, H. Zhao, G. Wang, Tunable synthesis of imines and secondary-amines from tandem hydrogenation-coupling of aromatic nitro and aldehyde over NiCo<sub>5</sub> bi-metallic catalyst, *Appl. Catal. B*, 280 (2021) 119448.
- [7] X. Cui, K. Liang, M. Tian, Y. Zhu, J. Ma, Z. Dong, Cobalt nanoparticles supported on N-doped mesoporous carbon as a highly efficient catalyst for the synthesis of aromatic amines, *J. Colloid Interface Sci.*, 501 (2017) 231-240.
- [8] Y.-Z. Chen, Y.-X. Zhou, H. Wang, J. Lu, T. Uchida, Q. Xu, S.-H. Yu, H.-L. Jiang, Multifunctional PdAg@MIL-101 for One-Pot Cascade Reactions: Combination of Host-Guest Cooperation and Bimetallic Synergy in Catalysis, *ACS Catal.*, 5 (2015) 2062-2069.
- [9] A. Cho, S. Byun, B.M. Kim, AuPd-Fe<sub>3</sub>O<sub>4</sub> Nanoparticle Catalysts for Highly Selective, One-Pot Cascade Nitro-Reduction and Reductive Amination, *Adv. Synth. Catal.*, 360 (2018) 1253-1261.
- [10] B. Sreedhar, P.S. Reddy, D.K. Devi, Direct One-Pot Reductive Amination of Aldehydes with Nitroarenes in a Domino Fashion: Catalysis by Gum-Acacia-Stabilized Palladium Nanoparticles, *JOC.*, 74 (2009) 8806-8809.
- [11] R.V. Jagadeesh, T. Stemmler, A.-E. Surkus, H. Junge, K. Junge, M. Beller, Hydrogenation using iron oxide-based nanocatalysts for the synthesis of amines, *Nat. Protoc.*, 10 (2015) 548-557.
- [12] Z. Wei, J. Wang, S. Mao, D. Su, H. Jin, Y. Wang, F. Xu, H. Li, Y. Wang, In Situ-Generated Co<sub>0</sub>-Co<sub>3</sub>O<sub>4</sub>/N-Doped Carbon Nanotubes Hybrids as Efficient and Chemoselective Catalysts for Hydrogenation of Nitroarenes, *ACS Catal.*, 5 (2015) 4783-4789.
- [13] T. Schwob, R. Kempe, A Reusable Co Catalyst for the Selective Hydrogenation of Functionalized Nitroarenes and the Direct Synthesis of Imines and Benzimidazoles from Nitroarenes and Aldehydes, *Angew. Chem. Int. Ed.*, 55 (2016) 15175-15179.
- [14] P. Zhang, Z. Zhao, B. Dyatkin, C. Liu, J. Qiu, In situ synthesis of cotton-derived Ni/C catalysts with controllable structures and enhanced catalytic performance, *Green Chem.*, 18 (2016) 3594-3599.
- [15] Z. Zhao, H. Yang, Ni-W<sub>2</sub>C/mpg-C<sub>3</sub>N<sub>4</sub> as a promising catalyst for selective hydrogenation of nitroarenes to corresponding aryl amines in the presence of Lewis acid, *J. Mol. Catal. A: Chem.*, 398 (2015) 268-274.
- [16] P. Zhou, C. Yu, L. Jiang, K. Lv, Z. Zhang, One-pot reductive amination of carbonyl compounds with nitro compounds with CO/H<sub>2</sub>O as the hydrogen donor over non-noble cobalt catalyst, *J. Catal.*, 352 (2017) 264-273.
